# Supplementary material for: Development of a method for trace level determination of antibiotics in drinking water sources by high performance liquid chromatography-tandem mass spectrometry
Source: Royal Society of Chemistry journal article supplement (doi:10.1039/c4ay01654h), 2015-01-01
Supplement: c4ay01654h1.pdf [file c4ay01654h1.pdf]

1  
2  
3  
4  
5  
6  
7  
8  
9  
10  
11  
12  
13  
14  
15  
16  
17  
18  
19  
20  
21  
22  
23  
24  
25  
26  
27  
28  
29  
30  
31

## Supplementary information for

# Development of a method for trace level determination of antibiotics in drinking water sources by high performance liquid chromatography-tandem mass spectrometry

### Tables

Table S1 Target antibiotics and their properties.

Table S2 Signal suppression of target antibiotics in the drinking water sources after extraction (antibiotics concentration, 50  $\mu\text{g L}^{-1}$ ).

### Figures

Figure S1 A total ion chromatogram reflecting the effect of organic mobile phase (mobile phase B) on chromatographic separation.

Figure S2 A total ion chromatogram reflecting the effect of formic acid concentration on chromatographic separation.

Figure S3 A total ion chromatogram reflecting the effect of flow rate on chromatographic separation.

Figure S4 A total ion chromatogram reflecting the effect of injection volume on chromatographic separation.

1 The signal suppression (or enhancement) for each antibiotic was calculated by  
2 the following equation:

$$\frac{A_{sp} - A_{non-sp}}{A_{sd}} - 1$$

3  
4 (1)

5 Where,  $A_{sp}$  is the peak area in drinking water sources extract spiked after extraction  
6 with  $50 \mu\text{g L}^{-1}$  of each antibiotic;  $A_{non-sp}$  is the peak area in drinking water sources  
7 extract non-spiked after extraction;  $A_{sd}$  is the peak area of the antibiotic standard  
8 mixture of  $50 \mu\text{g L}^{-1}$ .

9 A value of  $< 1$  indicates signal suppression, and a value of  $> 1$  indicates signal  
10 enhancement.

11  
12  
13  
14  
15  
16  
17  
18  
19  
20

1 Table S1 Target antibiotics and their properties.

| Group        | Properties                  |                     |                 |                                                                   |            |            |                                                                                       |                         |
|--------------|-----------------------------|---------------------|-----------------|-------------------------------------------------------------------|------------|------------|---------------------------------------------------------------------------------------|-------------------------|
|              | Compounds                   | Log K <sub>ow</sub> | pK <sub>a</sub> | Molecular form                                                    | MW (g/mol) | CAS number | Structure                                                                             | Excretion unchanged (%) |
| Sulfonamides | Trimethoprim (TMP)          | 0.91                | 7.1             | C <sub>14</sub> H <sub>18</sub> N <sub>4</sub> O <sub>3</sub>     | 290.32     | 738-70-5   | 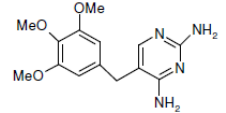   | 80-90                   |
|              | Sulfadiazine (SD)           | -0.09               | 6.4             | C <sub>10</sub> H <sub>10</sub> N <sub>4</sub> O <sub>2</sub> S   | 250.28     | 68-35-9    |    | 30-40                   |
|              | sulfamethazine (SMZ)        | 0.89                | 7.5             | C <sub>12</sub> H <sub>14</sub> N <sub>4</sub> O <sub>2</sub> S   | 278.33     | 57-68-1    |    | 60-85                   |
|              | Sulfamethoxazole (SMX)      | 0.89                | 5.7             | C <sub>10</sub> H <sub>11</sub> N <sub>3</sub> O <sub>3</sub> S   | 253.30     | 723-46-6   |    | 20-40                   |
|              | Sulfachloropyridazine (SCP) | 0.28                | 5.1/7.4         | C <sub>10</sub> H <sub>9</sub> Cl N <sub>4</sub> O <sub>2</sub> S | 284.72     | 80-32-0    |   |                         |
| Quinolones   | Enrofloxacin (ENR)          | 1.10                | 6.3/8.3         | C <sub>19</sub> H <sub>22</sub> FN <sub>3</sub> O <sub>3</sub>    | 359.39     | 93106-60-6 |  | 15-50                   |
|              | Ofloxacin (OFL)             | 0.35                | 6.0/7.6         | C <sub>18</sub> H <sub>20</sub> FN <sub>3</sub> O <sub>4</sub>    | 361.37     | 82419-36-1 |  | 30                      |

|                  |                          |      |             |                                                                               |        |            |                                                                                       |       |
|------------------|--------------------------|------|-------------|-------------------------------------------------------------------------------|--------|------------|---------------------------------------------------------------------------------------|-------|
| Tetracyclines    | Norfloxacin<br>(NOR)     | 0.28 | 6.3/8.7     | C <sub>16</sub> H <sub>18</sub> FN <sub>3</sub> O <sub>3</sub>                | 319.24 | 70458-96-7 | 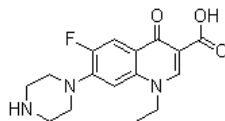   | 75-90 |
|                  | Ciprofloxacin<br>(CIP)   | 0.25 | 6.1/8.6     | C <sub>17</sub> H <sub>18</sub> FN <sub>3</sub> O <sub>3</sub>                | 367.81 | 93107-08-5 |    | 29-44 |
|                  | Tetracycline<br>(TC)     | 0.09 | 3.7/7.8/9.6 | C <sub>22</sub> H <sub>24</sub> N <sub>2</sub> O <sub>8</sub>                 | 480.90 | 64-75-5    |    | 60-70 |
|                  | Oxytetracycline<br>(OTC) | 0.08 | 3.2/7.8/9.6 | C <sub>22</sub> H <sub>24</sub> N <sub>2</sub> O <sub>9</sub>                 | 460.44 | 2058-46-0  |    | 70    |
| Macrolides       | Roxithromycin<br>(ROX)   | 2.75 | 9.2         | C <sub>41</sub> H <sub>76</sub> N <sub>2</sub> O <sub>15</sub>                | 837.05 | 80214-83-1 |    | <10   |
| Chloramphenicols | Chloramphenicol<br>(CAP) | -    | -           | C <sub>11</sub> H <sub>12</sub> Cl <sub>2</sub> N <sub>2</sub> O <sub>5</sub> | 323.13 | 56-75-7    |   | 5-10  |
|                  | Thiamphenicol<br>(TAP)   | -    | -           | C <sub>12</sub> H <sub>15</sub> Cl <sub>2</sub> NO <sub>5</sub> S             | 356.22 | 15318-45-3 |  | 70-90 |

1

2

1 Table S2 Signal suppression of target antibiotics in the drinking water sources after extraction  
2 (antibiotics concentration, 50  $\mu\text{g L}^{-1}$ ).

| antibiotics | Signal suppression (%) | RSD % |
|-------------|------------------------|-------|
| TMP         | -6.7                   | 0.9   |
| SD          | -7.0                   | 1.8   |
| SMZ         | -4.8                   | 1.2   |
| SMX         | -6.5                   | 2.0   |
| SCP         | -9.1                   | 4.0   |
| ENR         | -18.0                  | 2.3   |
| OFL         | -15.3                  | 1.7   |
| NOR         | -28.7                  | 2.5   |
| CIP         | -27.4                  | 1.3   |
| TC          | 15.2                   | 0.6   |
| OTC         | 12.6                   | 3.1   |
| ROX         | -1.2                   | 2.4   |
| CAP         | -9.8                   | 1.1   |
| TAP         | -5.2                   | 0.7   |

3  
4  
5  
6  
7  
8  
9  
10  
11  
12  
13  
14  
15  
16  
17  
18  
19  
20  
21  
22  
23  
24

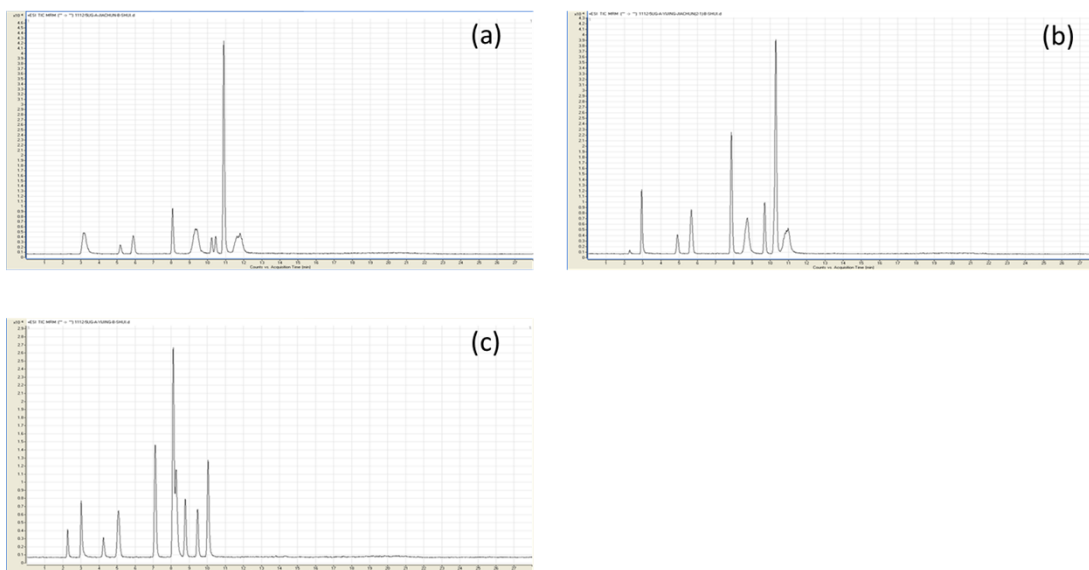

1  
 2 Figure S1 A total ion chromatogram reflecting the effect of organic mobile phase (mobile phase B)  
 3 on chromatographic separation (a) methanol; (b) methanol-acetonitrile (2:1,v/v); (c) acetonitrile.  
 4 Other parameters: mobile phase A: deionized water with 0.1% formic acid; flow rate: 0.2 mL min<sup>-1</sup>;  
 5 injection volume: 5 μL.  
 6  
 7

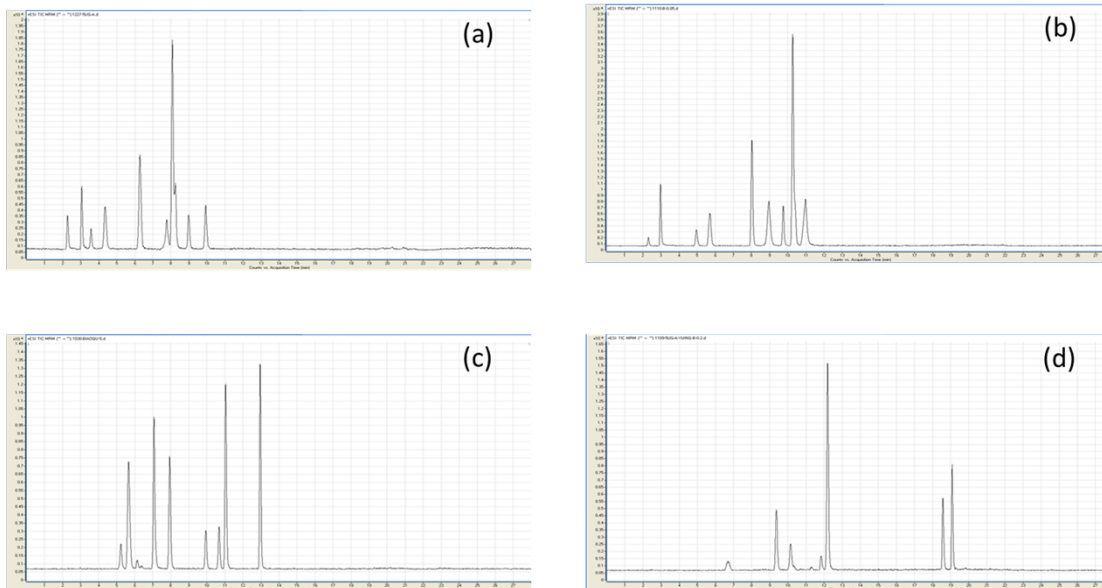

8  
 9 **Figure S2** A total ion chromatogram reflecting the effect of formic acid concentration on  
 10 chromatographic separation (a) 0%; (b) 0.05%; (c) 0.1%; (d) 0.2%. Other parameters: mobile  
 11 phase B: acetonitrile; flow rate: 0.2 mL min<sup>-1</sup>; injection volume: 5 μL.  
 12  
 13  
 14

1

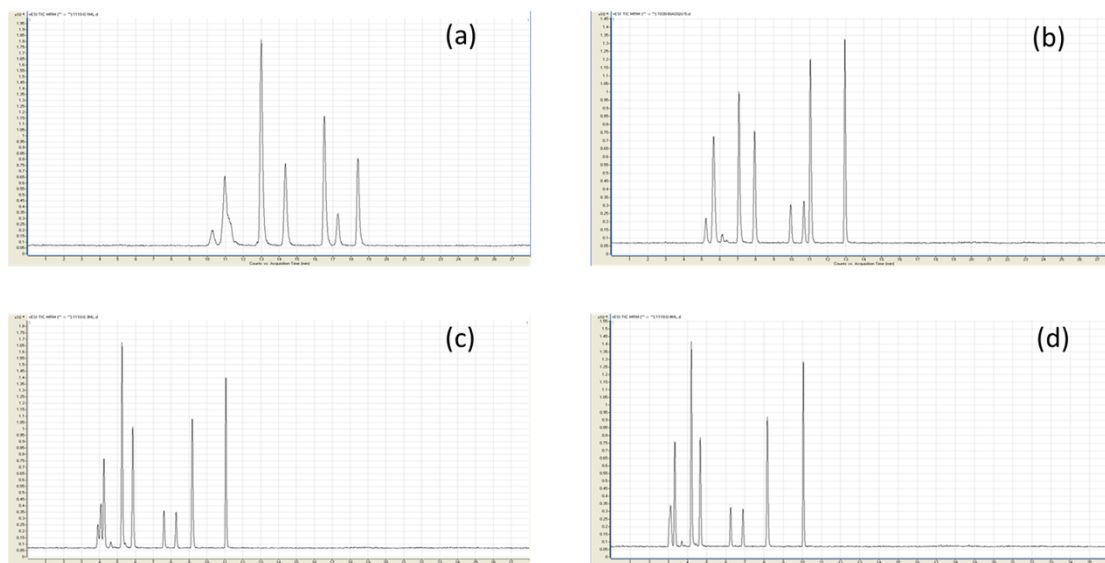

2

3 Figure S3 A total ion chromatogram reflecting the effect of flow rate on chromatographic  
4 separation (a) 0.1 mL min<sup>-1</sup>; (b) 0.2 mL min<sup>-1</sup>; (c) 0.3 mL min<sup>-1</sup>; (d) 0.4 mL min<sup>-1</sup>. Other  
5 parameters: mobile phase A: deionized water with 0.1% formic acid; mobile phase B: acetonitrile;  
6 injection volume: 5 μL.

7

8

9

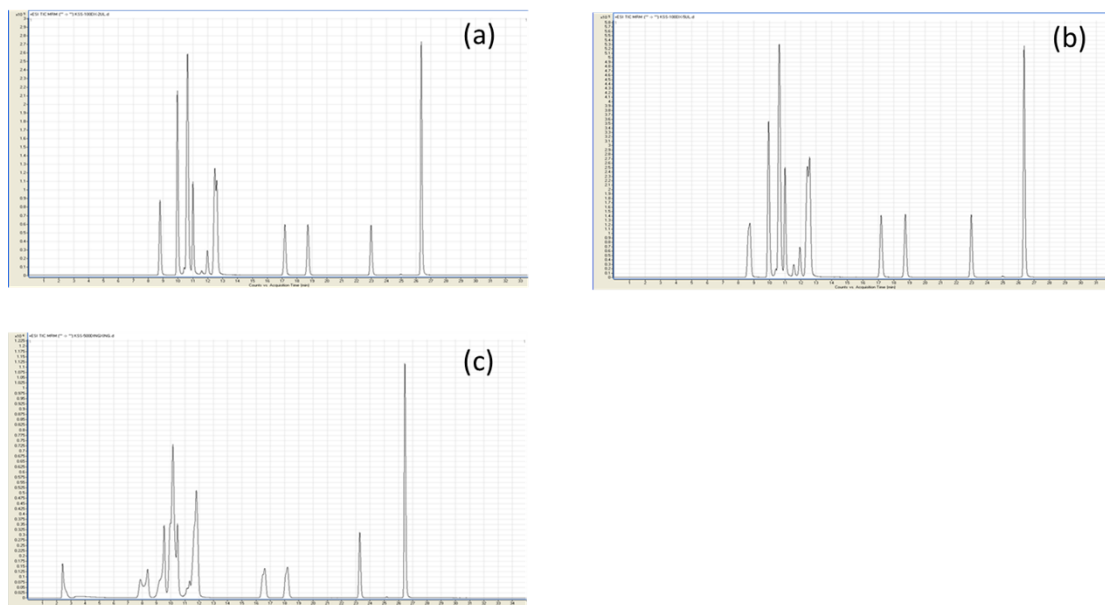

10

11 **Figure S4** A total ion chromatogram reflecting the effect of injection volume chromatographic  
12 separation (a) 2 μL; (b) 5 μL; (c) 10 μL. Other parameters: mobile phase A: deionized water with  
13 0.1% formic acid; mobile phase B: acetonitrile; flow rate: 0.2 mL min<sup>-1</sup>.
